# Supplementary material
Source: ML conference proceedings conference paper supplement (https://www.ecva.net/papers/eccv_2020/papers_ECCV/html/123470443_ECCV_2020_paper.php)
Supplement: Supplementary file 1 [file 123470443-supp.zip]

# Content Adaptive and Error Propagation Aware Deep Video Compression

Guo Lu<sup>\*1,2</sup>, Chunlei Cai<sup>\*2</sup>, Xiaoyun Zhang<sup>2</sup>, Li Chen<sup>2</sup>, Wanli Ouyang<sup>3</sup>,  
Dong Xu<sup>3</sup>, Zhiyong Gao<sup>2</sup>

<sup>1</sup> Beijing Institute of Technology, China

<sup>2</sup> Shanghai Jiao Tong University, China

<sup>3</sup> The University of Sydney, Australia

## 1 Evaluation Datasets

**HEVC Common Test Sequences** [6] are the most popular test sequences for evaluating the video compression performance [6]. We use Class B, Class C, Class D and Class E in our experiments. We don't include the video sequences from HEVC Class A dataset since it requires more than 11Gb memory for evaluation, which exceeds the capacity of our 1080Ti platform.

**Video Trace Library(VTL) dataset** [2] contains lots of raw YUV sequences used for the low-level computer vision tasks. Following the setting in [3], we use 20 video sequences with the resolution of  $352 \times 288$  in our experiments, and the maximum length of the video clips is set to 300 for all sequences.

**Ultra Video Group(UVG) dataset** [1] is a high frame rate(120fps) video dataset, in which the motion between neighbouring frames is small. Following the setting in [8, 5, 4], we use the video sequences with the resolution of  $1920 \times 1080$  in our experiments.

**MCL-JCV dataset** [7] consists of 30 videos with the resolution of  $1920 \times 1080$ . This dataset is widely used for video quality assessment. For a fair comparison with [3], we also include this dataset in our experiments.

## 2 Experimental Results on the Evaluation Datasets

Due to the limited space, we provide more experimental results in this supplementary. Specifically, the experimental results on HEVC Class E dataset are provided in Fig. 1. Besides, the experimental results on the MCL-JCV dataset, VTL dataset and UVG dataset are provided in Fig. 2.

## 3 FFmpeg Setting for Our experiments

In our experiments, we have two different settings: *fixed GoP setting* and *default setting*. For the *fixed GoP setting*, we follow the setting in DVC and the command lines are provided as follows,

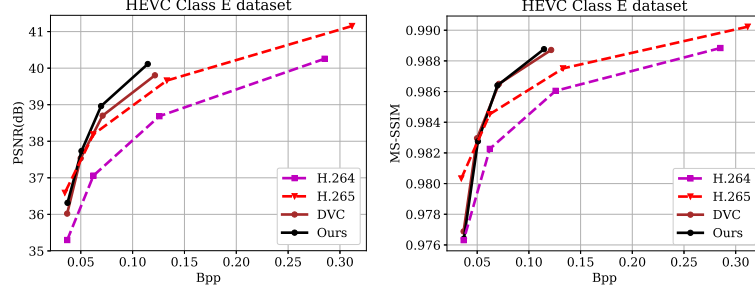

Fig. 1: The experimental results on HEVC Class E dataset at the fixed GoP setting.

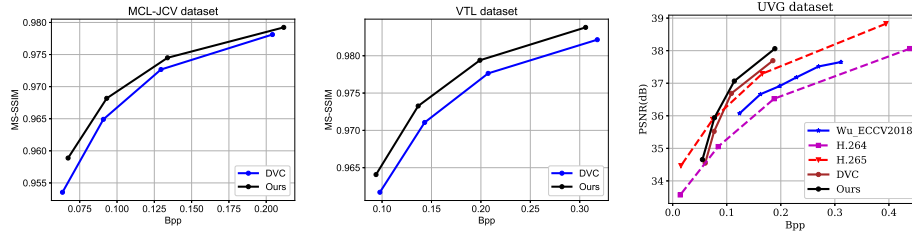

Fig. 2: Evaluation results for all video frames on the MCL-JCV dataset, VTL dataset and UVG dataset.

H.264: `ffmpeg -pix_fmt yuv420p -s WxH -r FR -i Video.yuv -vframes N -c:v libx264 -preset veryfast -tune zerolatency -crf Q -g GOP-bf 2 -b_strategy 0 -sc_threshold 0 output.mkv`

H.265: `ffmpeg -pix_fmt yuv420p -s WxH -r FR -i Video.yuv -vframes N -c:v libx265 -preset veryfast -tune zerolatency -x265-params "crf=Q:keyint=GOP" output.mkv`

$FR, N, Q, GOP$  represents the frame rate, the number of encoded frames, quality, GOP size, respectively.  $N$  is set to 100 for the HEVC datasets.  $GOP$  is set as 10 for the HEVC dataset and 12 for the UVG dataset.

For the *default setting*, the command lines are provided as follows,

H.265: `ffmpeg -pix_fmt yuv420p -s WxH -r 50 -i video.yuv -c:v libx265 -preset veryfast -tune zerolatency -x265-params "qp=Q" output.mkv`

$Q$  is the quantization parameter.  $W$  and  $H$  are the height and width of the yuv video.

## References

1. Ultra video group test sequences. <http://ultravideo.cs.tut.fi>, accessed: 2018-10-30
2. Video trace library(vtl) dataset. <http://trace.kom.aau.dk/>, accessed: 2018-10-30
3. Djelouah, A., Campos, J., Schaub-Meyer, S., Schroers, C.: Neural inter-frame compression for video coding. In: The IEEE International Conference on Computer Vision (ICCV) (October 2019)
4. Habibian, A., van Rozendaal, T., Tomczak, J.M., Cohen, T.S.: Video compression with rate-distortion autoencoders. arXiv preprint arXiv:1908.05717 (2019)
5. Lu, G., Ouyang, W., Xu, D., Zhang, X., Cai, C., Gao, Z.: DVC: An end-to-end deep video compression framework. In: Proceedings of the IEEE Conference on Computer Vision and Pattern Recognition, CVPR. pp. 11006–11015 (2019)
6. Sullivan, G.J., Ohm, J.R., Han, W.J., Wiegand, T., et al.: Overview of the high efficiency video coding(hevc) standard. TCSVT **22**(12), 1649–1668 (2012)
7. Wang, H., Gan, W., Hu, S., Lin, J.Y., Jin, L., Song, L., Wang, P., Katsavounidis, I., Aaron, A., Kuo, C.C.J.: Mcl-jcv: a jnd-based h. 264/avc video quality assessment dataset. In: 2016 IEEE International Conference on Image Processing (ICIP). pp. 1509–1513. IEEE (2016)
8. Wu, C.Y., Singhal, N., Krahenbuhl, P.: Video compression through image interpolation. In: ECCV (September 2018)
